# Supplementary material for: The genetic risk of mental health disorders in children from diverse population-based cohorts is modulated by poverty
Source: Research Square preprint supplement (doi:10.21203/rs.3.rs-8592737/v1), 2026-02-09
Supplement: Supplementary file 1 [file b5595599f950daaf60b95b48.docx]

The genetic risk of mental health disorders in children from diverse population-based cohorts is modulated by poverty

**Table S1. Summary of discovery genome-wide association studies (GWAS) used for polygenic score construction.**

| Phenotype | Author Year | Consortium | Ancestry | Sample Size  (Cases / Control) | SNPs | Reference |
| --- | --- | --- | --- | --- | --- | --- |
| Attention Deficit Hyperactivity Disorder (ADHD) | Demontis et al., 2023 | PGC | Danish | 38,691 / 186,843 | 6,774,224 | PMID: 36702997 |
| Major Depressive Disorder (MDD) | Adams et al., 2025 | PGC | Multi ancestry | 688,808 / 4,364,225 | 5,918,522 | PMID: 39814019 |

Note: SNPs = single-nucleotide polymorphisms available in the summary statistics.

**Table S2.** Descriptive analysis of mental health and absolute (Slope Index of Inequality, SII) and relative (Concentration Index, CXI) inequalities coefficients among participants from the 2004 Pelotas (Brazil) Birth Cohort.

|  | **Emotional** | | **ADHD** | |
| --- | --- | --- | --- | --- |
|  | **Pelotas** | **ABCD** | **Pelotas** | **ABCD** |
| **Income** | **Mean (±sd)** | **Mean (±sd)** | **Mean (±sd)** | **Mean (±sd)** |
| 1 (richest) | 49.26 (10.39) | 54.04 (6.01) | 48.01 (9.6) | 53.26 (5.51) |
| 2 | 49.99 (10.42) | 53.33 (5.40) | 49.85 (10.48) | 52.74 (4.94) |
| 3 (poorest) | 50.88 (10.64) | 54.32 (6.67) | 51.68 (10.78) | 53.64 (5.74) |
| **SII (95%CI)** | **-2.28 (-3.59; -0.97)** | **-1.61 (-2.04; -1.18)** | **-5.14 (-6.43; -3.84)** | **-1.42 (-1.80; -1.03)** |
| **CIX (95%CI)** | **-0.7 (-1.1; -0.3)** | **-0.4 (-0.5; 0.3)** | **-1.5 (-1.9; -1.1)** | **-0.4 (-0.5; -0.3)** |

95%CI: Confidence interval of 95%; SII: Slope Index of Inequality expressed in percentage points; CIX: Concentration Index (x 100)
